# Supplementary material
Source: Springer Nature journal article supplement (https://www.springermedizin.de/resource/supplementary/13054_2010_8730_MOESM1_ESM.pdf/9705850)
Supplement: MOESM1 [file 9705850]

**135 patients met inclusion  
criteria**

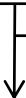

**34 subjects enrolled**

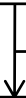

**30 patients completed  
assessment**

**Excluded (101)**

- 62 Inattention
- 15 Injury to  $\geq 6$  muscle groups
- 10 Non-English speaking
- 10 Declined participation
- 2 Prisoners
- 2 No Legal next of kin

**Unable to complete assessment (4)**

- 2 Restricted by pain
- 1 Died
- 1 Refused to cooperate
